# Supplementary material for: Towards a One Health Food Safety Strategy for Palestine: A Mixed-Method Study
Source: MDPI journal article supplement (doi:10.3390/antibiotics11101359), 2022-10-05
Supplement: s1 [file s1]

## Supplementary Table S2.

### Semi-structured observational tool

- 1 Name of the interviewer
- 2 Date |\_\_|\_\_|/|\_\_|\_\_|\_2022
- 3 Name of the settlement
- 4 Farm/abattoir no.

To be completed by the interviewer before starting the interview

---

#### General observations

---

- |    | Allowance to take photos (without showing the workers' faces)?                       | Yes (photos allowed)<br>No (no photos allowed)                                                                                        |
|----|--------------------------------------------------------------------------------------|---------------------------------------------------------------------------------------------------------------------------------------|
| 5  | Would you please show me where you retain water?                                     | 1. Observed<br>2. Not observed                                                                                                        |
| 6  | Would you please show me where you wash your hands?                                  | 1. Observed<br>2. Not observed                                                                                                        |
| 7  | Observe the availability of water and other products for cleaning hands in the area. | 1. Water, soap, and towel<br>2. Water and soap<br>3. Water and towel<br>4. Water alone<br>5. No water available<br>6. Other (specify) |
| 8  | Would you please show me your toilet?                                                | 1. Observed<br>2. Not observed                                                                                                        |
| 9  | Is the toilet inside or outside of the farm?                                         | 1. Inside<br>2. Outside                                                                                                               |
| 10 | Observe the cleanness of the toilet.                                                 | 1. Clean: no feces or urine outside the pit<br>2. Not clean: feces or urine outside the pit                                           |

#### For farms only

---

- |    |                                                              |                                                                                           |
|----|--------------------------------------------------------------|-------------------------------------------------------------------------------------------|
| 11 | Would you please show me your kitchen and where you sleep?   | 1. Observed<br>2. Not observed                                                            |
| 12 | Observe the cleanness of the kitchen and bedroom.            | 1. Open to the toilet<br>2. Open to poultry herd<br>3. Open to feed store<br>4. Separated |
| 13 | Would you please show me how you get rid of the dead poultry | 1. Observed<br>2. Not observed                                                            |

and dung?

- |    |                                                                                                  |                                |
|----|--------------------------------------------------------------------------------------------------|--------------------------------|
| 14 | Would you please show me your herd (to observe the visitor rules in terms of hygiene practices)? | 1. Observed<br>2. Not observed |
|----|--------------------------------------------------------------------------------------------------|--------------------------------|

For **abattoirs** only

---

- |    |                                                                                                                           |                                |
|----|---------------------------------------------------------------------------------------------------------------------------|--------------------------------|
| 15 | Would you please show me how you get rid of the slaughter waste (feathers, internal viscera, legs, poultry heads, etc.)?  | 1. Observed<br>2. Not observed |
| 16 | Would you please show me the workers' kitchen?                                                                            | 1. Observed<br>2. Not observed |
| 17 | Would you please show me the changing room for workers?                                                                   | 1. Observed<br>2. Not observed |
| 18 | Would you please show me the different areas of your abattoir (from the hanging area to the last stage before marketing)? | 1. Observed<br>2. Not observed |
| 19 | Would you please show me the workers during the slaughtering process (from slaughtering to chilling)?                     | 1. Observed<br>2. Not observed |
