# Supplementary material for: Towards a One Health Food Safety Strategy for Palestine: A Mixed-Method Study
Source: MDPI journal article supplement (doi:10.3390/antibiotics11101359), 2022-10-05
Supplement: s1 [file s1]

### Supplementary Figure S3:

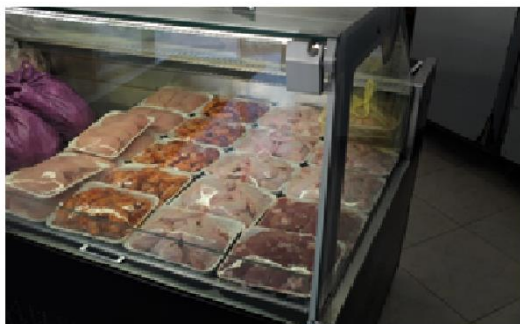

**Supplementary Figure 3. a:** Poultry is sold assorted, packaged, and refrigerated in meat stores.

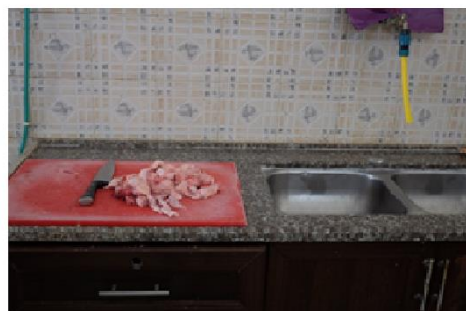

**Supplementary Figure 3. b:** Poultry remains lying next to the sink, which the meat seller tried to hide during our visit
