# Supplementary material for: Towards a One Health Food Safety Strategy for Palestine: A Mixed-Method Study
Source: MDPI journal article supplement (doi:10.3390/antibiotics11101359), 2022-10-05
Supplement: s1 [file s1]

**Supplementary Table S1: Participants in the multi-stakeholder discussion groups who represented the relevant sectors.**

| <b>Date</b>      | <b>Discussion group</b> | <b>Relevant sectors</b>                                     | <b>No. of participants</b> |
|------------------|-------------------------|-------------------------------------------------------------|----------------------------|
| July 7, 2021     | First discussion group  | Ministry of Health                                          | 3                          |
|                  |                         | Ministry of Agriculture/ Veterinary Services                | 2                          |
|                  |                         | Ministry of Local Governance                                | 2                          |
|                  |                         | Ministry of National Economy                                | 1                          |
|                  |                         | Academic sector                                             | 3                          |
| July 8, 2021     | Second discussion group | Ministry of Health/ Environmental Health Department         | 2                          |
|                  |                         | Palestinian Veterinarians Syndicate                         | 1                          |
|                  |                         | Private veterinarians specialize in poultry disease         | 2                          |
|                  |                         | Poultry producers                                           | 3                          |
| February 9, 2022 | Third discussion group  | Ministry of Health/ Environmental Health Department         | 2                          |
|                  |                         | Ministry of Agriculture / Veterinary Services               | 2                          |
|                  |                         | Ministry of Agriculture / Monitoring and Control Department | 2                          |
|                  |                         | Ministry of Local Governance                                | 1                          |
|                  |                         | Non-Government Organizations                                | 2                          |
|                  |                         | Academic sector                                             | 3                          |
|                  |                         | Industrial sector                                           | 3                          |
