# Supplementary material for: Towards a One Health Food Safety Strategy for Palestine: A Mixed-Method Study
Source: MDPI journal article supplement (doi:10.3390/antibiotics11101359), 2022-10-05
Supplement: s1 [file s1]

## Supplementary Figure S2:

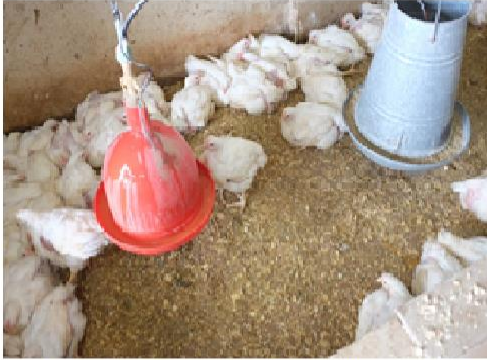

**Supplementary Figure 2. a:** Chickens kept in the interior of a traditional abattoir, ready to be selected for slaughter by consumers.

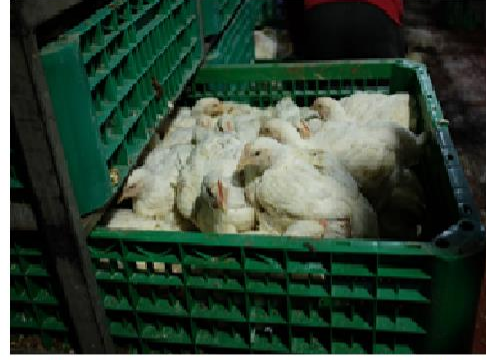

**Supplementary figure 2. b:** Chickens are delivered to public slaughterhouses in plastic boxes.

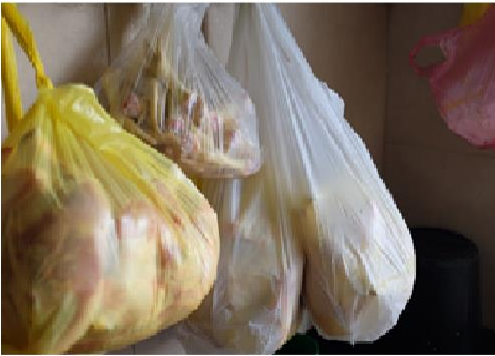

**Supplementary Figure 2. c:** Poultry meat or waste products such as chicken feet packed in plastic bags in a traditional abattoir.

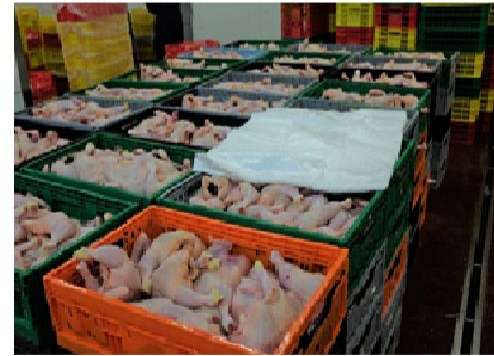

**Supplementary Figure 2. d:** Fresh assorted poultry packed in plastic boxes in a public slaughterhouse.
