# Supplementary material for: Towards a One Health Food Safety Strategy for Palestine: A Mixed-Method Study
Source: MDPI journal article supplement (doi:10.3390/antibiotics11101359), 2022-10-05
Supplement: s1 [file s1]

## Supplementary Figure S1:

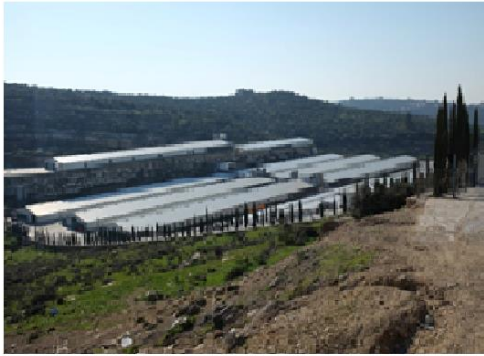

**Supplementary Figure 1. a:** Closed highly modernized buildings of a large-scale farm with biosecurity.

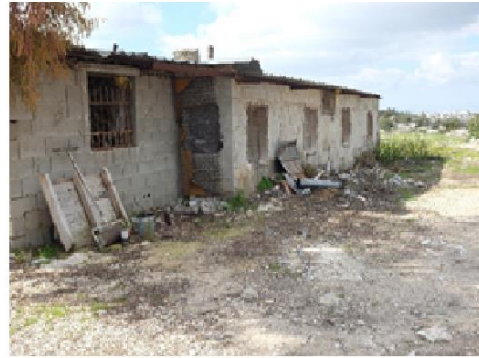

**Supplementary figure 1. b:** Simple small-scale farm with poor biosecurity.

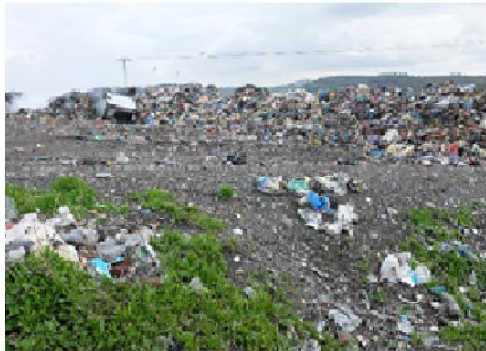

**Supplementary Figure 1. c:** Municipal dam, where among other things also dead animals are disposed of.

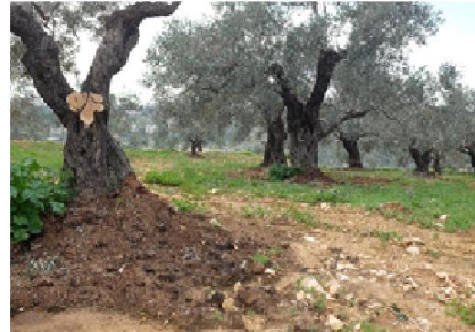

**Supplementary Figure 1. d:** Olive trees for which chicken manure is used as fertilizer.

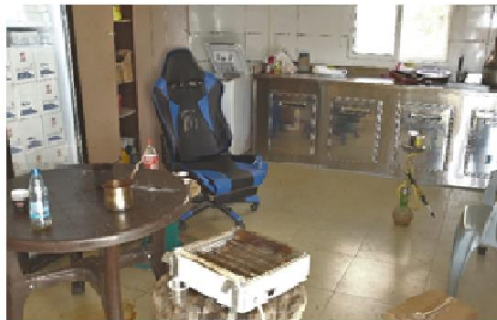

**Supplementary Figure 1. e:** Staffroom with kitchen and toilet in a separate building next to one of the large-scale farms visited

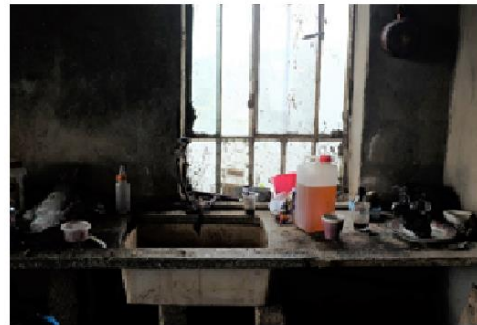

**Supplementary Figure 1. f:** Sink without soap or towel in a staffroom, which is separated from the small-scale farm only by a door
