# Supplementary material for: Towards a One Health Food Safety Strategy for Palestine: A Mixed-Method Study
Source: MDPI journal article supplement (doi:10.3390/antibiotics11101359), 2022-10-05
Supplement: s1 [file s1]

## Supplementary Table S3.

### Codebook

#### Theme 1: The current system for monitoring food production

| Category                       | Code                                            | Code description                                                                                                                                                                                       |
|--------------------------------|-------------------------------------------------|--------------------------------------------------------------------------------------------------------------------------------------------------------------------------------------------------------|
| Epidemiological investigations | Pathogen testing and case detection             | <i>Animals, meat, humans, and the environment can all be tested for pathogens. The results need to be properly communicated for case detection.</i>                                                    |
|                                | Follow-up of confirmed cases (test & slaughter) | <i>Once a case is detected, action must follow.</i>                                                                                                                                                    |
| Surveillance tools             | Periodic examinations (from farm to fork)       | <i>Regularly conducted examinations (by eye or laboratory testing) without suspicion at different stages along the food production chain: farms, transport, slaughter, markets, and food products.</i> |
|                                | Licensing of farms                              | <i>Palestinian law requires licensing of all farms, but many farms are unlicensed (random farms).</i>                                                                                                  |
|                                | Veterinary health certificates                  | <i>Veterinary health certificates must be issued by a recognized veterinarian before slaughter.</i>                                                                                                    |

#### Theme 2: Regulatory authorities with responsibilities relevant to food safety

| Category                               | Code                                              | Code description                                                                        |
|----------------------------------------|---------------------------------------------------|-----------------------------------------------------------------------------------------|
| Organization of regulatory authorities | Responsibilities of the regulatory authorities    | <i>Clear role distribution between regulatory authorities.</i>                          |
|                                        | Cooperation between regulatory authorities        | <i>Regulatory authorities working together on a particular issue.</i>                   |
|                                        | Overlaps/conflicts between regulatory authorities | <i>Lack of clear role distribution between regulatory authorities.</i>                  |
| Initiatives and strategies             | Toward a national food safety surveillance        | <i>Advances toward a national food safety surveillance plan and its implementation.</i> |
|                                        | Toward a national AMR surveillance                | <i>Advances toward a national AMR surveillance plan and its implementation.</i>         |

#### Theme 3: Public health

| Category                               | Code                                                                                      | Code description                                                                                                                                                                   |
|----------------------------------------|-------------------------------------------------------------------------------------------|------------------------------------------------------------------------------------------------------------------------------------------------------------------------------------|
| Drugs in human and veterinary medicine | Human medicine: drug prescription and use                                                 | <i>Standards, regulations, and usage of drugs, especially antimicrobials, in human medicine.</i>                                                                                   |
|                                        | Veterinary medicine: drug prescription and use                                            | <i>Standards, regulations, and usage of drugs, especially antimicrobials, in veterinary medicine with a focus on adherence to the safety period/withdrawal period.</i>             |
|                                        | Drug residues and AMR                                                                     | <i>Drug residues in meat or the environment and the associated growing AMR.</i>                                                                                                    |
| Worker health and safety               | Health insurance                                                                          | <i>Health insurance system for workers involved in the food production chain (farmers, butchers, traders, veterinarians, etc.).</i>                                                |
|                                        | Financial insurance and economic incentives                                               | <i>Financial insurance system for workers involved in the food production chain (farmers, butchers, traders, veterinarians, etc.) In the context of their economic incentives.</i> |
|                                        | Legal protection                                                                          | <i>Legal protection of workers involved in the food production chain (farmers, butchers, traders, veterinarians, etc.).</i>                                                        |
| Consumer health and safety             | Hygiene practices and contamination (along the food production chain)                     | <i>Hygiene practices and associated contamination from farm to fork (farms, transport, slaughter, markets) threatening consumer health and safety.</i>                             |
|                                        | <i>Salmonella</i> as an indicator of inadequate hygiene practices (in poultry production) | <i>Salmonella contamination in poultry production as a prime example of consumer health and safety hazards.</i>                                                                    |

Prevention measures for food safety

*Measures to prevent foodborne disease may include vaccinations, pasteurization, raising consumers' awareness, the guidance of farmers, etc.*

#### Theme 4: Available infrastructure and capacity building

| Category                  | Code                       | Code description                                                                                                                    |
|---------------------------|----------------------------|-------------------------------------------------------------------------------------------------------------------------------------|
| Expanding Infrastructure  | Laboratories               | <i>Requirements for laboratories in the context of food safety monitoring.</i>                                                      |
|                           | Slaughterhouses            | <i>Requirements for slaughterhouses in the context of food safety monitoring.</i>                                                   |
| Expanding human resources | Veterinary services        | <i>Expansion of veterinary services in terms of veterinarians' education, training, availability, etc.</i>                          |
|                           | Food and health inspectors | <i>Expansion of services provided by food and health inspectors in terms of inspectors' education, training, availability, etc.</i> |

#### Theme 5: Political and legal context

| Category                | Code                                          | Code description                                                                                                        |
|-------------------------|-----------------------------------------------|-------------------------------------------------------------------------------------------------------------------------|
| Palestinian policy      | Gap between the private and government sector | <i>Gaps between the private and government sector can manifest themselves through lacking guidance for farmers etc.</i> |
|                         | Regional differences                          | <i>Differences between Palestinian regions A, B, and C as well as differences between provinces or cities.</i>          |
|                         | Covid-19 consequences                         | <i>Direct and indirect consequences of the Covid-19 pandemic.</i>                                                       |
| Palestinian legislation | Food law                                      | <i>The role and importance of the Palestinian food law in the context of food safety.</i>                               |
|                         | Border control and smuggling                  | <i>Imports and exports of animals and food products to and from Palestine.</i>                                          |
